# Supplementary material for: Examining Complexity across Domains: Relating Subjective and Objective Measures of Affective Environmental Scenes, Paintings and Music
Source: PLOS journal article supplement (doi:10.1371/journal.pone.0072412), 2013-08-16
Supplement: S5 (10.1371/journal.pone.0072412.s005) [file journal.pone.0072412.s005]

Table S1

*Partial Spearman's rank-order correlations between ratings of complexity, pleasantness and arousal, controlling for effects of familiarity, in response to IAPS pictures ( $N = 96$ ).*

| Group             |              | Complexity |
|-------------------|--------------|------------|
| f ( $df = 89$ )   | Pleasantness | .02        |
| m ( $df = 91$ )   |              | .01        |
| All ( $df = 89$ ) |              | .01        |
| f ( $df = 89$ )   | Arousal      | .24*       |
| m ( $df = 89$ )   |              | .25*       |
| All ( $df = 91$ ) |              | .27*       |

*Note.* \* $p < .05$  after Bonferroni-Holm correction; f = females; m = males; All = all participants; the  $dfs$  are not the same for all correlations due to slightly different numbers of outliers.
