# Supplementary material for: Examining Complexity across Domains: Relating Subjective and Objective Measures of Affective Environmental Scenes, Paintings and Music
Source: PLOS journal article supplement (doi:10.1371/journal.pone.0072412), 2013-08-16
Supplement: S7 (10.1371/journal.pone.0072412.s007) [file journal.pone.0072412.s007]

Table S3

*Summary of linear stepwise regression analysis for seven variables of objective complexity predicting subjective complexity ratings of IAPS pictures ( $N = 72$ ).*

| Variable         | $B$      | $SE\ B$ | $\beta$ |
|------------------|----------|---------|---------|
| Constant         | 2.52     | .23     |         |
| RMS contrast $M$ | 20.05    | 3.76    | .54***  |
| Adjusted $R^2$   | .28      |         |         |
| $F$              | 28.37*** |         |         |

*Note.* \* $p < .05$ , \*\* $p < .01$ , \*\*\* $p < .001$ ;  $B$  = unstandardized regression coefficient;  $SE$  = standard error;  $\beta$  = standardized regression coefficient.
