# Supplementary material for: Examining Complexity across Domains: Relating Subjective and Objective Measures of Affective Environmental Scenes, Paintings and Music
Source: PLOS journal article supplement (doi:10.1371/journal.pone.0072412), 2013-08-16
Supplement: S14 (10.1371/journal.pone.0072412.s014) [file journal.pone.0072412.s014]

Table S10

*Partial Spearman's rank-order correlations, controlling for effects of familiarity, between ratings of complexity, pleasantness and arousal in response to piano solo and piano trio excerpts (N = 80).*

| Group         |              | Complexity | Pleasantness |
|---------------|--------------|------------|--------------|
| f (df = 69)   | Pleasantness | -.14       |              |
| m (df = 70)   |              | .41*       |              |
| All (df = 73) |              | .25*       |              |
| f (df = 69)   | Arousal      | .83*       | -.23*        |
| M (df = 70)   |              | .77*       | .35*         |
| All (df = 73) |              | .84*       | .09          |

*Note.* \* $p < .05$  after Bonferroni-Holm correction; f = females; m = males; All = all participants; the *dfs* are not the same for all correlations due to slightly different numbers of outliers.
